# Supplementary material for: Modular synthesis of aryl amines from 3-alkynyl-2-pyrones
Source: Royal Society of Chemistry journal article supplement (doi:10.1039/d4sc04885g), 2024-01-01
Supplement: d4sc04885g1.pdf [file d4sc04885g1.pdf]

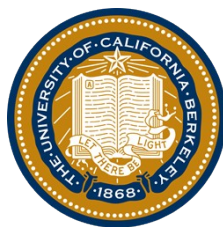

University of California, Berkeley  
College of Chemistry  
X-ray Crystallography Facility

## X-ray Crystal Structure Report

Sample ID: KGardner01\_Sarpong  
Submitted by: Kristen Gardner  
P. I.: Prof. Richmond Sarpong  
Report Date: June 23<sup>rd</sup>, 2021

If you have any questions or concerns regarding the information  
contained in this report, please contact Dr. Nick Settineri  
([nsettine@berkeley.edu](mailto:nsettine@berkeley.edu)).

**Important** – The content of this report is intended only for the investigator, laboratory, or group listed above that requested the performed research and could contain confidential and/or privileged material. Any review, retransmission, distribution or other use of, or taking of any action in reliance upon, this information by persons or parties other than the intended recipients(s) without their expressed permission is strictly prohibited. If you receive a copy of this report by mistake, please destroy all copies (electronic or hard) and do not disseminate any information that may be contained in it to anyone. Your further reading of this report constitutes your agreement with this disclaimer.

A colorless block 0.27 x 0.17 x 0.11 mm in size was mounted on a Cryoloop with Paratone oil. Data were collected in a nitrogen gas stream at 100(2) K using omega scans. Crystal-to-detector distance was 30.25 mm and exposure time was 0.50 seconds per frame using a scan width of 0.5°. Data collection was 100% complete to 74.000° in  $\theta$ . A total of 19025 reflections were collected covering the indices  $-14 \leq h \leq 9$ ,  $-17 \leq k \leq 17$ ,  $-12 \leq l \leq 12$ . 3443 reflections were founded to be symmetry independent, with an  $R_{\text{int}}$  of 0.0375. Indexing and unit cell refinement indicated a primitive, monoclinic lattice. The space group was found to be P 21/c (No. 14). The data were integrated using the CrysAlis<sup>Pro</sup> 1.171.41.109a software program and scaled using the SCALE3 ABSPACK scaling algorithm. Solution by intrinsic phasing (SHELXT-2015) produced a heavy-atom phasing model consistent with the proposed structure. All non-hydrogen atoms were refined anisotropically by full-matrix least-squares (SHELXL-2014). All hydrogen atoms were placed using a riding model. Their positions were constrained relative to their parent atom using the appropriate HFIX command in SHELXL-2014.

Table 1. Crystal data and structure refinement for KGardner01\_Sarpong.

|                                   |                                             |                   |
|-----------------------------------|---------------------------------------------|-------------------|
| Identification code               | KGardner01_Sarpong                          |                   |
| Empirical formula                 | C <sub>22</sub> H <sub>21</sub> N O         |                   |
| Formula weight                    | 315.40                                      |                   |
| Temperature                       | 100(2) K                                    |                   |
| Wavelength                        | 1.54184 Å                                   |                   |
| Crystal system                    | Monoclinic                                  |                   |
| Space group                       | P 21/c                                      |                   |
| Unit cell dimensions              | a = 11.86970(10) Å                          | α = 90°.          |
|                                   | b = 14.3822(2) Å                            | β = 95.7760(10)°. |
|                                   | c = 9.93520(10) Å                           | γ = 90°.          |
| Volume                            | 1687.45(3) Å <sup>3</sup>                   |                   |
| Z                                 | 4                                           |                   |
| Density (calculated)              | 1.241 Mg/m <sup>3</sup>                     |                   |
| Absorption coefficient            | 0.585 mm <sup>-1</sup>                      |                   |
| F(000)                            | 672                                         |                   |
| Crystal size                      | 0.270 x 0.170 x 0.110 mm <sup>3</sup>       |                   |
| Theta range for data collection   | 3.743 to 74.445°.                           |                   |
| Index ranges                      | -14 ≤ h ≤ 9, -17 ≤ k ≤ 17, -12 ≤ l ≤ 12     |                   |
| Reflections collected             | 19025                                       |                   |
| Independent reflections           | 3443 [R(int) = 0.0375]                      |                   |
| Completeness to theta = 74.000°   | 99.8 %                                      |                   |
| Absorption correction             | Semi-empirical from equivalents             |                   |
| Max. and min. transmission        | 1.00000 and 0.74274                         |                   |
| Refinement method                 | Full-matrix least-squares on F <sup>2</sup> |                   |
| Data / restraints / parameters    | 3443 / 0 / 217                              |                   |
| Goodness-of-fit on F <sup>2</sup> | 1.029                                       |                   |
| Final R indices [I > 2σ(I)]       | R1 = 0.0384, wR2 = 0.0970                   |                   |
| R indices (all data)              | R1 = 0.0412, wR2 = 0.0983                   |                   |
| Extinction coefficient            | n/a                                         |                   |
| Largest diff. peak and hole       | 0.218 and -0.266 e.Å <sup>-3</sup>          |                   |

Table 2. Atomic coordinates ( $\times 10^4$ ) and equivalent isotropic displacement parameters ( $\text{\AA}^2 \times 10^3$ ) for kgardner01\_sarpong.  $U(\text{eq})$  is defined as one third of the trace of the orthogonalized  $U^{ij}$  tensor.

|       | x       | y       | z       | $U(\text{eq})$ |
|-------|---------|---------|---------|----------------|
| O(1)  | 1368(1) | 2605(1) | 6824(1) | 26(1)          |
| N(1)  | 2985(1) | 3083(1) | 5035(1) | 18(1)          |
| C(1)  | 2866(1) | 3649(1) | 6239(1) | 21(1)          |
| C(2)  | 1663(1) | 3556(1) | 6612(1) | 24(1)          |
| C(3)  | 1508(1) | 2070(1) | 5640(1) | 26(1)          |
| C(4)  | 2720(1) | 2113(1) | 5286(1) | 21(1)          |
| C(5)  | 3922(1) | 3278(1) | 4310(1) | 17(1)          |
| C(6)  | 3977(1) | 4142(1) | 3640(1) | 17(1)          |
| C(7)  | 3062(1) | 4855(1) | 3616(1) | 17(1)          |
| C(8)  | 1918(1) | 4615(1) | 3327(1) | 19(1)          |
| C(9)  | 1087(1) | 5297(1) | 3238(1) | 22(1)          |
| C(10) | 1374(1) | 6227(1) | 3445(1) | 22(1)          |
| C(11) | 2503(1) | 6469(1) | 3751(1) | 21(1)          |
| C(12) | 3339(1) | 5788(1) | 3828(1) | 19(1)          |
| C(13) | 4909(1) | 4327(1) | 2932(1) | 18(1)          |
| C(14) | 5784(1) | 3686(1) | 2842(1) | 18(1)          |
| C(15) | 6763(1) | 3905(1) | 2076(1) | 19(1)          |
| C(16) | 6611(1) | 4345(1) | 817(1)  | 23(1)          |
| C(17) | 7519(1) | 4494(1) | 61(1)   | 27(1)          |
| C(18) | 8600(1) | 4209(1) | 560(1)  | 26(1)          |
| C(19) | 8768(1) | 3786(1) | 1819(1) | 23(1)          |
| C(20) | 7861(1) | 3640(1) | 2576(1) | 21(1)          |
| C(21) | 5701(1) | 2827(1) | 3477(1) | 20(1)          |
| C(22) | 4787(1) | 2630(1) | 4205(1) | 19(1)          |

Table 3. Bond lengths [Å] and angles [°] for kgardner01\_sarpong.

---

|                |            |
|----------------|------------|
| O(1)-C(3)      | 1.4292(15) |
| O(1)-C(2)      | 1.4325(14) |
| N(1)-C(5)      | 1.4124(13) |
| N(1)-C(4)      | 1.4578(14) |
| N(1)-C(1)      | 1.4661(14) |
| C(1)-C(2)      | 1.5169(15) |
| C(3)-C(4)      | 1.5161(15) |
| C(5)-C(22)     | 1.3988(15) |
| C(5)-C(6)      | 1.4135(15) |
| C(6)-C(13)     | 1.3958(14) |
| C(6)-C(7)      | 1.4918(14) |
| C(7)-C(12)     | 1.3930(15) |
| C(7)-C(8)      | 1.4030(14) |
| C(8)-C(9)      | 1.3875(15) |
| C(9)-C(10)     | 1.3912(16) |
| C(10)-C(11)    | 1.3877(16) |
| C(11)-C(12)    | 1.3915(15) |
| C(13)-C(14)    | 1.3982(15) |
| C(14)-C(21)    | 1.3947(15) |
| C(14)-C(15)    | 1.4859(14) |
| C(15)-C(16)    | 1.3969(16) |
| C(15)-C(20)    | 1.4003(15) |
| C(16)-C(17)    | 1.3907(16) |
| C(17)-C(18)    | 1.3897(17) |
| C(18)-C(19)    | 1.3879(17) |
| C(19)-C(20)    | 1.3900(15) |
| C(21)-C(22)    | 1.3917(15) |
| <br>           |            |
| C(3)-O(1)-C(2) | 110.04(8)  |
| C(5)-N(1)-C(4) | 118.17(8)  |
| C(5)-N(1)-C(1) | 116.83(8)  |
| C(4)-N(1)-C(1) | 110.61(8)  |
| N(1)-C(1)-C(2) | 108.72(9)  |
| O(1)-C(2)-C(1) | 111.73(9)  |

|                   |            |
|-------------------|------------|
| O(1)-C(3)-C(4)    | 111.20(9)  |
| N(1)-C(4)-C(3)    | 107.70(9)  |
| C(22)-C(5)-N(1)   | 121.81(9)  |
| C(22)-C(5)-C(6)   | 118.79(9)  |
| N(1)-C(5)-C(6)    | 119.38(9)  |
| C(13)-C(6)-C(5)   | 118.75(9)  |
| C(13)-C(6)-C(7)   | 118.28(9)  |
| C(5)-C(6)-C(7)    | 122.94(9)  |
| C(12)-C(7)-C(8)   | 118.52(10) |
| C(12)-C(7)-C(6)   | 119.98(9)  |
| C(8)-C(7)-C(6)    | 121.45(10) |
| C(9)-C(8)-C(7)    | 120.38(10) |
| C(8)-C(9)-C(10)   | 120.61(10) |
| C(11)-C(10)-C(9)  | 119.35(10) |
| C(10)-C(11)-C(12) | 120.22(10) |
| C(11)-C(12)-C(7)  | 120.91(10) |
| C(6)-C(13)-C(14)  | 122.58(10) |
| C(21)-C(14)-C(13) | 117.89(10) |
| C(21)-C(14)-C(15) | 120.95(9)  |
| C(13)-C(14)-C(15) | 121.14(10) |
| C(16)-C(15)-C(20) | 118.22(10) |
| C(16)-C(15)-C(14) | 121.19(10) |
| C(20)-C(15)-C(14) | 120.54(10) |
| C(17)-C(16)-C(15) | 121.10(10) |
| C(18)-C(17)-C(16) | 119.94(11) |
| C(19)-C(18)-C(17) | 119.68(10) |
| C(18)-C(19)-C(20) | 120.32(10) |
| C(19)-C(20)-C(15) | 120.71(10) |
| C(22)-C(21)-C(14) | 120.65(10) |
| C(21)-C(22)-C(5)  | 121.30(10) |

---

Symmetry transformations used to generate equivalent atoms:

Table 4. Anisotropic displacement parameters ( $\text{\AA}^2 \times 10^3$ ) for kgardner01\_sarpong. The anisotropic displacement factor exponent takes the form:  $-2\pi^2 [ h^2 a^{*2} U^{11} + \dots + 2 h k a^* b^* U^{12} ]$

|       | U <sup>11</sup> | U <sup>22</sup> | U <sup>33</sup> | U <sup>23</sup> | U <sup>13</sup> | U <sup>12</sup> |
|-------|-----------------|-----------------|-----------------|-----------------|-----------------|-----------------|
| O(1)  | 25(1)           | 29(1)           | 28(1)           | 5(1)            | 11(1)           | 1(1)            |
| N(1)  | 18(1)           | 17(1)           | 20(1)           | 0(1)            | 5(1)            | 0(1)            |
| C(1)  | 21(1)           | 22(1)           | 19(1)           | 0(1)            | 4(1)            | 2(1)            |
| C(2)  | 23(1)           | 26(1)           | 25(1)           | 3(1)            | 7(1)            | 4(1)            |
| C(3)  | 22(1)           | 27(1)           | 29(1)           | 3(1)            | 6(1)            | -4(1)           |
| C(4)  | 21(1)           | 20(1)           | 24(1)           | 3(1)            | 5(1)            | -1(1)           |
| C(5)  | 15(1)           | 19(1)           | 17(1)           | -1(1)           | 1(1)            | -1(1)           |
| C(6)  | 16(1)           | 18(1)           | 17(1)           | -1(1)           | 1(1)            | -1(1)           |
| C(7)  | 17(1)           | 19(1)           | 15(1)           | 2(1)            | 3(1)            | 1(1)            |
| C(8)  | 18(1)           | 19(1)           | 20(1)           | 1(1)            | 2(1)            | -2(1)           |
| C(9)  | 15(1)           | 24(1)           | 26(1)           | 1(1)            | 1(1)            | 0(1)            |
| C(10) | 20(1)           | 21(1)           | 26(1)           | 2(1)            | 3(1)            | 5(1)            |
| C(11) | 22(1)           | 17(1)           | 23(1)           | 1(1)            | 2(1)            | -1(1)           |
| C(12) | 16(1)           | 21(1)           | 19(1)           | 2(1)            | 2(1)            | -1(1)           |
| C(13) | 18(1)           | 17(1)           | 19(1)           | 0(1)            | 2(1)            | -1(1)           |
| C(14) | 17(1)           | 20(1)           | 19(1)           | -2(1)           | 2(1)            | -1(1)           |
| C(15) | 18(1)           | 16(1)           | 23(1)           | -4(1)           | 5(1)            | -1(1)           |
| C(16) | 20(1)           | 24(1)           | 25(1)           | 0(1)            | 3(1)            | -1(1)           |
| C(17) | 27(1)           | 30(1)           | 24(1)           | 3(1)            | 7(1)            | -4(1)           |
| C(18) | 22(1)           | 28(1)           | 31(1)           | -3(1)           | 11(1)           | -6(1)           |
| C(19) | 17(1)           | 22(1)           | 31(1)           | -5(1)           | 4(1)            | -2(1)           |
| C(20) | 19(1)           | 20(1)           | 23(1)           | -2(1)           | 3(1)            | -1(1)           |
| C(21) | 17(1)           | 19(1)           | 23(1)           | -2(1)           | 3(1)            | 2(1)            |
| C(22) | 19(1)           | 17(1)           | 22(1)           | 1(1)            | 2(1)            | 0(1)            |

Table 5. Hydrogen coordinates ( $\times 10^4$ ) and isotropic displacement parameters ( $\text{\AA}^2 \times 10^3$ ) for kgardner01\_sarpong.

|       | x    | y    | z    | U(eq) |
|-------|------|------|------|-------|
| H(1A) | 3032 | 4309 | 6052 | 25    |
| H(1B) | 3407 | 3435 | 6999 | 25    |
| H(2A) | 1583 | 3916 | 7447 | 29    |
| H(2B) | 1133 | 3822 | 5878 | 29    |
| H(3A) | 995  | 2311 | 4872 | 31    |
| H(3B) | 1300 | 1415 | 5796 | 31    |
| H(4A) | 3242 | 1865 | 6042 | 26    |
| H(4B) | 2805 | 1734 | 4470 | 26    |
| H(8)  | 1710 | 3981 | 3191 | 23    |
| H(9)  | 315  | 5127 | 3034 | 26    |
| H(10) | 803  | 6693 | 3377 | 27    |
| H(11) | 2705 | 7102 | 3908 | 25    |
| H(12) | 4110 | 5962 | 4028 | 23    |
| H(13) | 4951 | 4911 | 2494 | 21    |
| H(16) | 5876 | 4545 | 472  | 27    |
| H(17) | 7401 | 4791 | -796 | 32    |
| H(18) | 9220 | 4303 | 41   | 32    |
| H(19) | 9507 | 3595 | 2166 | 28    |
| H(20) | 7987 | 3357 | 3442 | 25    |
| H(21) | 6274 | 2372 | 3413 | 23    |
| H(22) | 4750 | 2044 | 4638 | 23    |



Table 6. Torsion angles [°] for kgardner01\_sarpong.

---

|                         |             |
|-------------------------|-------------|
| C(5)-N(1)-C(1)-C(2)     | 162.48(9)   |
| C(4)-N(1)-C(1)-C(2)     | -58.46(11)  |
| C(3)-O(1)-C(2)-C(1)     | -57.32(12)  |
| N(1)-C(1)-C(2)-O(1)     | 56.62(12)   |
| C(2)-O(1)-C(3)-C(4)     | 59.23(12)   |
| C(5)-N(1)-C(4)-C(3)     | -161.57(9)  |
| C(1)-N(1)-C(4)-C(3)     | 59.99(11)   |
| O(1)-C(3)-C(4)-N(1)     | -60.33(12)  |
| C(4)-N(1)-C(5)-C(22)    | -20.52(14)  |
| C(1)-N(1)-C(5)-C(22)    | 115.39(11)  |
| C(4)-N(1)-C(5)-C(6)     | 157.80(10)  |
| C(1)-N(1)-C(5)-C(6)     | -66.29(12)  |
| C(22)-C(5)-C(6)-C(13)   | -1.87(15)   |
| N(1)-C(5)-C(6)-C(13)    | 179.76(9)   |
| C(22)-C(5)-C(6)-C(7)    | 176.01(9)   |
| N(1)-C(5)-C(6)-C(7)     | -2.36(15)   |
| C(13)-C(6)-C(7)-C(12)   | -45.86(14)  |
| C(5)-C(6)-C(7)-C(12)    | 136.25(11)  |
| C(13)-C(6)-C(7)-C(8)    | 131.45(11)  |
| C(5)-C(6)-C(7)-C(8)     | -46.44(15)  |
| C(12)-C(7)-C(8)-C(9)    | 0.87(15)    |
| C(6)-C(7)-C(8)-C(9)     | -176.48(10) |
| C(7)-C(8)-C(9)-C(10)    | -0.55(17)   |
| C(8)-C(9)-C(10)-C(11)   | -0.39(17)   |
| C(9)-C(10)-C(11)-C(12)  | 1.00(17)    |
| C(10)-C(11)-C(12)-C(7)  | -0.68(16)   |
| C(8)-C(7)-C(12)-C(11)   | -0.26(15)   |
| C(6)-C(7)-C(12)-C(11)   | 177.13(10)  |
| C(5)-C(6)-C(13)-C(14)   | 0.94(15)    |
| C(7)-C(6)-C(13)-C(14)   | -177.04(9)  |
| C(6)-C(13)-C(14)-C(21)  | 0.81(15)    |
| C(6)-C(13)-C(14)-C(15)  | 179.80(10)  |
| C(21)-C(14)-C(15)-C(16) | 136.38(11)  |
| C(13)-C(14)-C(15)-C(16) | -42.57(15)  |

|                         |             |
|-------------------------|-------------|
| C(21)-C(14)-C(15)-C(20) | -41.03(15)  |
| C(13)-C(14)-C(15)-C(20) | 140.02(11)  |
| C(20)-C(15)-C(16)-C(17) | 1.74(17)    |
| C(14)-C(15)-C(16)-C(17) | -175.73(10) |
| C(15)-C(16)-C(17)-C(18) | -0.42(18)   |
| C(16)-C(17)-C(18)-C(19) | -0.74(18)   |
| C(17)-C(18)-C(19)-C(20) | 0.53(18)    |
| C(18)-C(19)-C(20)-C(15) | 0.85(17)    |
| C(16)-C(15)-C(20)-C(19) | -1.95(16)   |
| C(14)-C(15)-C(20)-C(19) | 175.53(10)  |
| C(13)-C(14)-C(21)-C(22) | -1.63(16)   |
| C(15)-C(14)-C(21)-C(22) | 179.39(10)  |
| C(14)-C(21)-C(22)-C(5)  | 0.70(16)    |
| N(1)-C(5)-C(22)-C(21)   | 179.42(10)  |
| C(6)-C(5)-C(22)-C(21)   | 1.09(16)    |

---

Symmetry transformations used to generate equivalent atoms:
