# Supplementary material for: Modular synthesis of aryl amines from 3-alkynyl-2-pyrones
Source: Royal Society of Chemistry journal article supplement (doi:10.1039/d4sc04885g), 2024-01-01
Supplement: d4sc04885g2.xlsx [file d4sc04885g2.xlsx]

## Sheet: Curated_Data_For_Regession
label		label	r1		x1	x2	x3	x4	x5	x6	x7	x8	x9	x10	x11	x12	x13	x14	x15	x16	x17	x18	x19	x20	x21	x22	x23	x24	x25	x26	x27	x28	x29	x30	x31	x32	x33	x34	x35	x36	x37	x38	x39	x40	x41	x42	x43	x44	x45
File_ID	Manuscript_ID	SMILES	exp_yield	Used For	HOMO_Boltz	HOMO_min	HOMO_max	HOMO_low_E	LUMO_Boltz	LUMO_min	LUMO_max	LUMO_low_E	η_Boltz	η_min	η_max	η_low_E	μ_Boltz	μ_min	μ_max	μ_low_E	ω_Boltz	ω_min	ω_max	ω_low_E	polar_aniso(Debye)_Boltz	polar_aniso(Debye)_min	polar_aniso(Debye)_max	polar_aniso(Debye)_low_E	polar_iso(Debye)_Boltz	polar_iso(Debye)_min	polar_iso(Debye)_max	polar_iso(Debye)_low_E	dipole(Debye)_Boltz	dipole(Debye)_min	dipole(Debye)_max	dipole(Debye)_low_E	volume(Bohr_radius³/mol)_Boltz	volume(Bohr_radius³/mol)_min	volume(Bohr_radius³/mol)_max	volume(Bohr_radius³/mol)_low_E	SASA_sphericity_Boltz	SASA_sphericity_min	SASA_sphericity_max	SASA_sphericity_low_E	SASA_surface_area(Å²)_Boltz	SASA_surface_area(Å²)_min	SASA_surface_area(Å²)_max	SASA_surface_area(Å²)_low_E	SASA_volume(Å³)_Boltz
SecN1	8a	N1CCOCC1	74	Training	-0.292504	-0.29546	-0.28099	-0.29546	0.065104	0.06473	0.0652	0.0652	0.357608	0.34572	0.36066	0.36066	-0.1137	-0.11513	-0.10813	-0.11513	0.0180797	0.01691	0.01838	0.01838	10.4458	10.2184	10.5042	10.5042	57.5136	57.391	57.5451	57.5451	1.50358	1.2632	1.5653	1.5653	851.368	826.759	947.22	826.759	0.945055	0.944516	0.947154	0.944516	240.92	240.259	241.089	241.089	323.048
SecN2	8b	N1CCCCC1	70	Training	-0.28732	-0.28732	-0.28732	-0.28732	0.06475	0.06475	0.06475	0.06475	0.35207	0.35207	0.35207	0.35207	-0.111285	-0.111285	-0.111285	-0.111285	0.01759	0.01759	0.01759	0.01759	9.72385	9.72385	9.72385	9.72385	65.4228	65.4228	65.4228	65.4228	0.9071	0.9071	0.9071	0.9071	924.428	924.428	924.428	924.428	0.940465	0.940465	0.940465	0.940465	252.08	252.08	252.08	252.08	343.238
SecN8	8c	CN1CCNCC1	65	Training	-0.27701	-0.27767	-0.26016	-0.27767	0.0656097	0.06155	0.06646	0.06646	0.34262	0.32171	0.34413	0.34413	-0.1057	-0.10591	-0.099305	-0.105605	0.0163014	0.01533	0.01649	0.0162	13.6436	10.1684	14.3056	14.3056	74.8219	73.0107	74.8684	74.8684	0.8301	0.4526	1.6237	0.4526	953.194	892.503	1125.33	986.416	0.931628	0.930761	0.940615	0.930761	271.54	266.79	271.89	271.89	378.362
SecN28	8d	N1CCSCC1	67	Training	-0.27264	-0.2727	-0.2727	-0.2727	0.0622663	0.06228	0.06228	0.06228	0.334907	0.33498	0.33498	0.33498	-0.105187	-0.10521	-0.10521	-0.10521	0.0165164	0.01652	0.01652	0.01652	18.5735	18.5776	18.5776	18.5776	71.8773	71.8931	71.8931	71.8931	1.97197	1.9724	1.9724	1.9724	847.866	848.052	848.052	848.052	0.942759	0.942966	0.942966	0.942966	254.544	254.6	254.6	254.6	349.712
SecNSar2	8e	OC1CCNCC1	46	Training	-0.291011	-0.29859	-0.27955	-0.29584	0.0576957	0.05006	0.06134	0.06134	0.348706	0.32963	0.35718	0.35718	-0.116657	-0.123565	-0.113875	-0.11725	0.019524	0.01851	0.02181	0.01924	10.2604	6.05989	12.9434	10.7906	68.9425	67.9625	69.3286	69.1789	1.73	1.2066	3.0609	1.8184	968.412	772.474	1179.59	1089.06	0.937491	0.934678	0.944241	0.935146	264.561	260.829	266.029	266.029	367.286
SecN172	8f	N#CC1CCNCC1	56	Training	-0.304846	-0.30892	-0.29709	-0.3032	0.0471611	0.04093	0.04822	0.04822	0.352007	0.33802	0.35601	0.35142	-0.128842	-0.130915	-0.12749	-0.12749	0.0235849	0.02313	0.02427	0.02313	18.9126	11.4961	27.734	11.4961	77.6222	76.7554	78.5204	76.9626	4.01338	3.3113	5.0105	3.3113	1118.63	1044.17	1213.92	1044.17	0.92488	0.919308	0.931492	0.929001	282.264	278.98	285.16	280.01	396.603
SecN68	8g	CC1CNCCC1	68	Training	-0.28713	-0.28738	-0.27792	-0.28738	0.0650318	0.0582	0.0652	0.0652	0.352161	0.33612	0.35258	0.35258	-0.111049	-0.11109	-0.10986	-0.11109	0.0175083	0.0175	0.01795	0.0175	16.1314	9.3497	16.2927	16.2927	77.5588	76.2839	77.5979	77.5979	0.829108	0.8199	1.2251	0.8199	920.956	919	1008.81	919	0.930354	0.930228	0.940412	0.930228	277.209	271.76	277.37	277.37	389.543
SecN54	8h	CC1NCCCC1	32	Training	-0.286185	-0.2878	-0.27937	-0.2878	0.0646044	0.05902	0.06505	0.06455	0.350789	0.3417	0.35235	0.35235	-0.11079	-0.11183	-0.10716	-0.111625	0.0174953	0.01667	0.0183	0.01768	16.0464	11.0606	16.148	16.148	77.7916	76.4378	77.8972	77.8972	0.955328	0.9016	1.1562	0.9093	1230.97	1044.54	1274.15	1274.15	0.928718	0.928449	0.937054	0.928449	278.104	273.22	278.22	278.22	390.326
SecN21	8i	c1(CCNC2)c2cccc1	62	Training	-0.287632	-0.28769	-0.28372	-0.28769	0.0185122	0.01846	0.02206	0.01846	0.306145	0.30578	0.30615	0.30615	-0.13456	-0.134615	-0.13083	-0.134615	0.0295767	0.02799	0.0296	0.0296	54.5851	54.0989	54.5923	54.5923	105.688	105.682	106.063	105.682	0.854042	0.8433	0.8542	0.8542	1142.2	1138.35	1404.18	1138.35	0.915079	0.915074	0.915394	0.915074	309.986	309.631	309.991	309.991	449.237
SecN81	8j	C1(c2cnccc2)CCCCN1	23	Training	-0.295641	-0.29699	-0.28658	-0.29699	0.00408281	-0.00037	0.00689	0.00397	0.299723	0.28874	0.30096	0.30096	-0.145779	-0.14665	-0.13985	-0.14651	0.0354514	0.03332	0.03676	0.03566	60.7164	47.7145	65.4015	60.0497	125.746	122.62	125.891	125.742	2.66028	1.9171	3.5678	2.4351	1638.68	1382.19	1788.93	1686.6	0.889665	0.889408	0.905283	0.889408	357.097	345.181	357.321	357.321	532.466
SecN1117	8k	[H][C@@]12[C@](CCCN2)([H])CCCC1	7	Training	-0.284825	-0.28695	-0.27672	-0.28695	0.065526	0.0641	0.0659	0.0659	0.350351	0.34082	0.35285	0.35285	-0.10965	-0.110525	-0.10631	-0.110525	0.0171584	0.01658	0.01731	0.01731	27.8494	27.7215	27.8833	27.8833	108.232	107.932	108.312	108.312	0.885212	0.8164	1.1483	0.8164	1482.7	1417.72	1499.72	1499.72	0.91695	0.916742	0.917797	0.916742	326.608	326.12	326.74	326.74	487.351
SecN133	8l	CC1CNCC(C)C1	64	Training	-0.287187	-0.28745	-0.28745	-0.28745	0.0648606	0.06492	0.06492	0.06492	0.352048	0.35237	0.35237	0.35237	-0.111163	-0.111265	-0.111265	-0.111265	0.0175539	0.01757	0.01757	0.01757	21.2999	21.3194	21.3194	21.3194	89.7359	89.8181	89.8181	89.8181	0.734128	0.7348	0.7348	0.7348	1471.86	1473.21	1473.21	1473.21	0.917743	0.918583	0.918583	0.918583	302.813	303.09	303.09	303.09	436.427
SecN3	8n	N1CCCC1	65	Training	-0.29612	-0.29612	-0.29612	-0.29612	0.05754	0.05754	0.05754	0.05754	0.35366	0.35366	0.35366	0.35366	-0.11929	-0.11929	-0.11929	-0.11929	0.02012	0.02012	0.02012	0.02012	7.224	7.224	7.224	7.224	53.3828	53.3828	53.3828	53.3828	1.3713	1.3713	1.3713	1.3713	663.23	663.23	663.23	663.23	0.94679	0.94679	0.94679	0.94679	229.81	229.81	229.81	229.81	301.792
SecN94	8o	CC1CCCN1	68	Training	-0.294839	-0.29547	-0.29215	-0.29547	0.0597816	0.05702	0.06043	0.06043	0.35462	0.34917	0.3559	0.3559	-0.117529	-0.117565	-0.11752	-0.11752	0.0194742	0.0194	0.01979	0.0194	13.0589	10.9316	13.5583	13.5583	65.6294	65.386	65.6865	65.6865	1.28696	1.265	1.3805	1.265	795.634	790.824	816.124	790.824	0.933576	0.933057	0.935787	0.933057	257.418	256.3	257.68	257.68	350.312
SecN17	8p	CCCCNCCCC	40	Training	-0.285997	-0.28777	-0.27288	-0.28752	0.0613791	0.04929	0.06891	0.06351	0.347376	0.33173	0.35622	0.35103	-0.112309	-0.11923	-0.10571	-0.112005	0.0181713	0.01651	0.02109	0.01787	30.6522	16.3607	44.5269	44.5269	107.005	104.858	108.657	108.657	0.919927	0.7781	1.187	0.9099	1515.14	1199.56	1956.93	1475.87	0.863791	0.845643	0.905603	0.845643	369.78	341.75	383.25	383.25	537.028
SecN38	8q	C=CCNCC=C	18	Training	-0.295627	-0.299	-0.284	-0.29814	0.0352404	0.02469	0.0413	0.03175	0.330867	0.31482	0.33675	0.32989	-0.130193	-0.137155	-0.122985	-0.133195	0.0256317	0.02336	0.02906	0.02689	34.4129	11.3575	55.183	41.1362	80.9606	78.5186	82.734	82.6143	0.969089	0.621	1.3728	0.8331	1060.23	815.979	1410.7	1005.68	0.89711	0.88397	0.922036	0.88397	298.069	285.151	305.652	305.652	411.041
SecN63	8r	CNCC	63	Training	-0.288712	-0.28872	-0.28871	-0.28871	0.0669757	0.06654	0.06709	0.06709	0.355688	0.35526	0.3558	0.3558	-0.110868	-0.11109	-0.11081	-0.11081	0.0172829	0.01726	0.01737	0.01726	10.8207	8.10828	11.5321	11.5321	47.1581	46.7285	47.2708	47.2708	1.00038	0.9934	1.027	0.9934	792.011	789.963	799.818	789.963	0.935213	0.933607	0.941335	0.933607	227.125	224.36	227.85	227.85	291.089
SecN18	8s	CNCc1ccccc1	38	Training	-0.289598	-0.29073	-0.2867	-0.28968	0.0212142	0.01695	0.02241	0.02176	0.310812	0.30365	0.31314	0.31144	-0.134192	-0.134875	-0.13396	-0.13396	0.0289726	0.02874	0.02995	0.02881	49.8922	43.064	56.531	56.531	98.8143	97.9566	99.6923	99.6923	1.08078	1.0112	1.1856	1.0112	1250.41	1084.2	1501.66	1086.33	0.901079	0.89464	0.911291	0.89464	312.868	307.612	316.422	316.422	445.056
SecN6	8t	CCNCC	44	Training	-0.288307	-0.28861	-0.28381	-0.28845	0.0660666	0.06223	0.06761	0.06585	0.354373	0.34604	0.35622	0.3543	-0.11112	-0.1113	-0.1105	-0.1113	0.0174215	0.01714	0.01774	0.01748	16.0295	10.5649	16.752	16.752	59.4863	58.2808	59.6469	59.6469	0.954944	0.9458	1.0812	0.9458	858.67	688.598	943.339	874.8	0.914827	0.912523	0.932488	0.912523	259.134	250.5	260.33	260.33	343.196
SecN174	8v	CC(C)NCC	0	Training	-0.288054	-0.28899	-0.28184	-0.28899	0.0634575	0.05804	0.06531	0.06414	0.351512	0.34151	0.35313	0.35313	-0.112298	-0.11305	-0.110455	-0.112425	0.0179423	0.01735	0.01867	0.0179	16.2942	9.9424	16.7561	16.7561	71.2426	69.8316	71.3991	71.3991	0.97968	0.9469	1.0885	0.9705	991.922	971.354	1074.24	977.534	0.913747	0.911443	0.933705	0.911443	280.413	270.17	281.571	281.571	385.644
SecN143	8w	COCCNCCOC	0	Training	-0.284736	-0.2992	-0.27484	-0.2852	0.0721518	0.05479	0.07498	0.07498	0.356888	0.33079	0.36367	0.36018	-0.106292	-0.118525	-0.102905	-0.10511	0.0158432	0.01534	0.01953	0.01534	23.7769	12.1317	40.2616	23.4758	91.7932	89.1422	92.7341	92.443	1.05149	0.4514	3.1244	0.7099	1381.11	960.804	1688.39	1238.1	0.86023	0.852328	0.917294	0.858469	351.628	318.27	360.779	355.52	497.727
SecN19	8z	c1(CNCc2ccccc2)ccccc1	0	Training	-0.289708	-0.29212	-0.27768	-0.29137	0.0152212	0.01407	0.01669	0.01669	0.304929	0.29175	0.30806	0.30806	-0.137243	-0.138295	-0.131805	-0.13734	0.0308847	0.02977	0.03112	0.03061	80.8168	56.2592	96.4608	76.3633	164.008	155.504	166.16	164.802	0.977142	0.824	1.1291	0.9742	1805.77	1384.71	2264.22	1721.89	0.854111	0.841439	0.905374	0.849572	422.96	385.212	433.193	426.323	645.329
SecNSar15	8ab	CNC(C1=CC=CC=C1)c2ccccc2	0	Validation	-0.288319	-0.28903	-0.28814	-0.28814	0.00980847	0.0096	0.01155	0.0096	0.298127	0.29774	0.29988	0.29774	-0.139255	-0.13927	-0.13839	-0.13927	0.0325219	0.03193	0.03257	0.03257	47.1674	41.2022	75.3597	41.2022	163.809	163.667	164.09	163.739	0.93521	0.8783	1.1681	0.8783	1836.02	1491.01	2019.99	1856.41	0.863347	0.862783	0.870844	0.862783	414.705	407.483	415.153	415.153	637.03
SecN20	8ac	CCCNCCC	22	Validation	-0.286304	-0.28796	-0.27402	-0.28796	0.0635043	0.05785	0.0678	0.06463	0.349809	0.33689	0.35568	0.35259	-0.1114	-0.11292	-0.105575	-0.111665	0.0177438	0.01654	0.01855	0.01768	23.7122	14.6431	30.376	30.376	83.1223	81.2354	83.9636	83.9636	0.90352	0.8049	1.1035	0.8625	1176.11	912.564	1350.75	1196.49	0.889014	0.878125	0.921935	0.878125	314.843	294.98	321.49	321.49	440.227
SecN99	8ad	O=C(OC)C1CCNCC1	80	Validation	-0.292959	-0.29471	-0.28311	-0.29471	0.0469042	0.0391	0.04908	0.04908	0.339863	0.32221	0.34379	0.34379	-0.123027	-0.12397	-0.122005	-0.122815	0.0222793	0.02194	0.02313	0.02194	25.823	18.1869	28.7861	28.7861	93.4714	92.1062	93.9249	93.9249	2.28937	1.6257	2.49	2.49	1512.06	1120.41	1569.56	1569.56	0.90133	0.897663	0.912391	0.897663	326.238	319.419	328.579	328.579	474.086
SecN234	8ae	CN(C)[C@@H]1CCNC1	57	Validation	-0.278047	-0.28093	-0.26179	-0.27868	0.0629116	0.05442	0.06434	0.06434	0.340959	0.31766	0.34327	0.34302	-0.107568	-0.109295	-0.10296	-0.10717	0.0169716	0.01669	0.01793	0.01674	20.5235	14.9172	21.6259	21.6259	86.1128	84.5682	86.3136	86.3136	0.811109	0.4809	1.6875	0.4809	1174.21	1106.84	1377.32	1148.6	0.92289	0.921597	0.932071	0.921597	296.21	290.64	296.91	296.91	425.001
SecN1248	8af	FC([C@@H]1NCCC1)(F)F	0	Validation	-0.309489	-0.31934	-0.3066	-0.3066	0.0574736	0.04381	0.06123	0.06087	0.366963	0.36033	0.37264	0.36747	-0.126008	-0.136355	-0.122865	-0.122865	0.0216892	0.02054	0.0258	0.02054	11.1245	10.574	11.8174	10.6688	64.6176	64.4069	65.0424	64.4069	2.18116	1.6795	3.6914	1.6795	967.539	894.973	1087.39	894.973	0.934039	0.927125	0.937546	0.937546	276.818	274.918	281.248	274.918	390.93
[truncated: 131 more columns]

## Sheet: Modeling_Data
			r1		x1	x2	x3	x4	x5	x6	x7	x8	x9	x10	x11	x12	x13	x14	x15	x16	x17	x18	x19	x20	x21	x22	x23	x24	x25	x26	x27	x28	x29	x30	x31	x32	x33	x34	x35	x36	x37	x38	x39	x40	x41	x42	x43	x44	x45
File_ID	Manuscript_ID	SMILES	exp_yield	Set	HOMO_Boltz	HOMO_min	HOMO_max	HOMO_low_E	LUMO_Boltz	LUMO_min	LUMO_max	LUMO_low_E	η_Boltz	η_min	η_max	η_low_E	μ_Boltz	μ_min	μ_max	μ_low_E	ω_Boltz	ω_min	ω_max	ω_low_E	polar_aniso(Debye)_Boltz	polar_aniso(Debye)_min	polar_aniso(Debye)_max	polar_aniso(Debye)_low_E	polar_iso(Debye)_Boltz	polar_iso(Debye)_min	polar_iso(Debye)_max	polar_iso(Debye)_low_E	dipole(Debye)_Boltz	dipole(Debye)_min	dipole(Debye)_max	dipole(Debye)_low_E	volume(Bohr_radius³/mol)_Boltz	volume(Bohr_radius³/mol)_min	volume(Bohr_radius³/mol)_max	volume(Bohr_radius³/mol)_low_E	SASA_sphericity_Boltz	SASA_sphericity_min	SASA_sphericity_max	SASA_sphericity_low_E	SASA_surface_area(Å²)_Boltz	SASA_surface_area(Å²)_min	SASA_surface_area(Å²)_max	SASA_surface_area(Å²)_low_E	SASA_volume(Å³)_Boltz
SecN1	8a	N1CCOCC1	74	Training	-0.292504	-0.29546	-0.28099	-0.29546	0.065104	0.06473	0.0652	0.0652	0.357608	0.34572	0.36066	0.36066	-0.1137	-0.11513	-0.10813	-0.11513	0.0180797	0.01691	0.01838	0.01838	10.4458	10.2184	10.5042	10.5042	57.5136	57.391	57.5451	57.5451	1.50358	1.2632	1.5653	1.5653	851.368	826.759	947.22	826.759	0.945055	0.944516	0.947154	0.944516	240.92	240.259	241.089	241.089	323.048
SecN2	8b	N1CCCCC1	70	Training	-0.28732	-0.28732	-0.28732	-0.28732	0.06475	0.06475	0.06475	0.06475	0.35207	0.35207	0.35207	0.35207	-0.111285	-0.111285	-0.111285	-0.111285	0.01759	0.01759	0.01759	0.01759	9.72385	9.72385	9.72385	9.72385	65.4228	65.4228	65.4228	65.4228	0.9071	0.9071	0.9071	0.9071	924.428	924.428	924.428	924.428	0.940465	0.940465	0.940465	0.940465	252.08	252.08	252.08	252.08	343.238
SecN8	8c	CN1CCNCC1	65	Training	-0.27701	-0.27767	-0.26016	-0.27767	0.0656097	0.06155	0.06646	0.06646	0.34262	0.32171	0.34413	0.34413	-0.1057	-0.10591	-0.099305	-0.105605	0.0163014	0.01533	0.01649	0.0162	13.6436	10.1684	14.3056	14.3056	74.8219	73.0107	74.8684	74.8684	0.8301	0.4526	1.6237	0.4526	953.194	892.503	1125.33	986.416	0.931628	0.930761	0.940615	0.930761	271.54	266.79	271.89	271.89	378.362
SecN28	8d	N1CCSCC1	67	Training	-0.27264	-0.2727	-0.2727	-0.2727	0.0622663	0.06228	0.06228	0.06228	0.334907	0.33498	0.33498	0.33498	-0.105187	-0.10521	-0.10521	-0.10521	0.0165164	0.01652	0.01652	0.01652	18.5735	18.5776	18.5776	18.5776	71.8773	71.8931	71.8931	71.8931	1.97197	1.9724	1.9724	1.9724	847.866	848.052	848.052	848.052	0.942759	0.942966	0.942966	0.942966	254.544	254.6	254.6	254.6	349.712
SecNSar2	8e	OC1CCNCC1	46	Training	-0.291011	-0.29859	-0.27955	-0.29584	0.0576957	0.05006	0.06134	0.06134	0.348706	0.32963	0.35718	0.35718	-0.116657	-0.123565	-0.113875	-0.11725	0.019524	0.01851	0.02181	0.01924	10.2604	6.05989	12.9434	10.7906	68.9425	67.9625	69.3286	69.1789	1.73	1.2066	3.0609	1.8184	968.412	772.474	1179.59	1089.06	0.937491	0.934678	0.944241	0.935146	264.561	260.829	266.029	266.029	367.286
SecN172	8f	N#CC1CCNCC1	56	Training	-0.304846	-0.30892	-0.29709	-0.3032	0.0471611	0.04093	0.04822	0.04822	0.352007	0.33802	0.35601	0.35142	-0.128842	-0.130915	-0.12749	-0.12749	0.0235849	0.02313	0.02427	0.02313	18.9126	11.4961	27.734	11.4961	77.6222	76.7554	78.5204	76.9626	4.01338	3.3113	5.0105	3.3113	1118.63	1044.17	1213.92	1044.17	0.92488	0.919308	0.931492	0.929001	282.264	278.98	285.16	280.01	396.603
SecN68	8g	CC1CNCCC1	68	Training	-0.28713	-0.28738	-0.27792	-0.28738	0.0650318	0.0582	0.0652	0.0652	0.352161	0.33612	0.35258	0.35258	-0.111049	-0.11109	-0.10986	-0.11109	0.0175083	0.0175	0.01795	0.0175	16.1314	9.3497	16.2927	16.2927	77.5588	76.2839	77.5979	77.5979	0.829108	0.8199	1.2251	0.8199	920.956	919	1008.81	919	0.930354	0.930228	0.940412	0.930228	277.209	271.76	277.37	277.37	389.543
SecN54	8h	CC1NCCCC1	32	Training	-0.286185	-0.2878	-0.27937	-0.2878	0.0646044	0.05902	0.06505	0.06455	0.350789	0.3417	0.35235	0.35235	-0.11079	-0.11183	-0.10716	-0.111625	0.0174953	0.01667	0.0183	0.01768	16.0464	11.0606	16.148	16.148	77.7916	76.4378	77.8972	77.8972	0.955328	0.9016	1.1562	0.9093	1230.97	1044.54	1274.15	1274.15	0.928718	0.928449	0.937054	0.928449	278.104	273.22	278.22	278.22	390.326
SecN21	8i	c1(CCNC2)c2cccc1	62	Training	-0.287632	-0.28769	-0.28372	-0.28769	0.0185122	0.01846	0.02206	0.01846	0.306145	0.30578	0.30615	0.30615	-0.13456	-0.134615	-0.13083	-0.134615	0.0295767	0.02799	0.0296	0.0296	54.5851	54.0989	54.5923	54.5923	105.688	105.682	106.063	105.682	0.854042	0.8433	0.8542	0.8542	1142.2	1138.35	1404.18	1138.35	0.915079	0.915074	0.915394	0.915074	309.986	309.631	309.991	309.991	449.237
SecN81	8j	C1(c2cnccc2)CCCCN1	23	Test	-0.295641	-0.29699	-0.28658	-0.29699	0.00408281	-0.00037	0.00689	0.00397	0.299723	0.28874	0.30096	0.30096	-0.145779	-0.14665	-0.13985	-0.14651	0.0354514	0.03332	0.03676	0.03566	60.7164	47.7145	65.4015	60.0497	125.746	122.62	125.891	125.742	2.66028	1.9171	3.5678	2.4351	1638.68	1382.19	1788.93	1686.6	0.889665	0.889408	0.905283	0.889408	357.097	345.181	357.321	357.321	532.466
SecN1117	8k	[H][C@@]12[C@](CCCN2)([H])CCCC1	7	Test	-0.284825	-0.28695	-0.27672	-0.28695	0.065526	0.0641	0.0659	0.0659	0.350351	0.34082	0.35285	0.35285	-0.10965	-0.110525	-0.10631	-0.110525	0.0171584	0.01658	0.01731	0.01731	27.8494	27.7215	27.8833	27.8833	108.232	107.932	108.312	108.312	0.885212	0.8164	1.1483	0.8164	1482.7	1417.72	1499.72	1499.72	0.91695	0.916742	0.917797	0.916742	326.608	326.12	326.74	326.74	487.351
SecN133	8l	CC1CNCC(C)C1	64	Training	-0.287187	-0.28745	-0.28745	-0.28745	0.0648606	0.06492	0.06492	0.06492	0.352048	0.35237	0.35237	0.35237	-0.111163	-0.111265	-0.111265	-0.111265	0.0175539	0.01757	0.01757	0.01757	21.2999	21.3194	21.3194	21.3194	89.7359	89.8181	89.8181	89.8181	0.734128	0.7348	0.7348	0.7348	1471.86	1473.21	1473.21	1473.21	0.917743	0.918583	0.918583	0.918583	302.813	303.09	303.09	303.09	436.427
SecN224	8m	C[C@H]1CCC[C@@H](C)N1	0	Training	-0.286927	-0.2883	-0.27944	-0.2883	0.0634486	0.06323	0.06466	0.06323	0.350376	0.3441	0.35153	0.35153	-0.111739	-0.112535	-0.10739	-0.112535	0.0178169	0.01676	0.01801	0.01801	20.1408	19.7708	20.2088	20.2088	90.3086	89.7974	90.4046	90.4046	0.939147	0.9152	1.0708	0.9152	1338.15	1175.88	1367.75	1367.75	0.915235	0.915235	0.915393	0.915235	304.841	304.84	304.85	304.85	438.233
SecN3	8n	N1CCCC1	65	Training	-0.29612	-0.29612	-0.29612	-0.29612	0.05754	0.05754	0.05754	0.05754	0.35366	0.35366	0.35366	0.35366	-0.11929	-0.11929	-0.11929	-0.11929	0.02012	0.02012	0.02012	0.02012	7.224	7.224	7.224	7.224	53.3828	53.3828	53.3828	53.3828	1.3713	1.3713	1.3713	1.3713	663.23	663.23	663.23	663.23	0.94679	0.94679	0.94679	0.94679	229.81	229.81	229.81	229.81	301.792
SecN94	8o	CC1CCCN1	68	Training	-0.294839	-0.29547	-0.29215	-0.29547	0.0597816	0.05702	0.06043	0.06043	0.35462	0.34917	0.3559	0.3559	-0.117529	-0.117565	-0.11752	-0.11752	0.0194742	0.0194	0.01979	0.0194	13.0589	10.9316	13.5583	13.5583	65.6294	65.386	65.6865	65.6865	1.28696	1.265	1.3805	1.265	795.634	790.824	816.124	790.824	0.933576	0.933057	0.935787	0.933057	257.418	256.3	257.68	257.68	350.312
SecN17	8p	CCCCNCCCC	40	Training	-0.285997	-0.28777	-0.27288	-0.28752	0.0613791	0.04929	0.06891	0.06351	0.347376	0.33173	0.35622	0.35103	-0.112309	-0.11923	-0.10571	-0.112005	0.0181713	0.01651	0.02109	0.01787	30.6522	16.3607	44.5269	44.5269	107.005	104.858	108.657	108.657	0.919927	0.7781	1.187	0.9099	1515.14	1199.56	1956.93	1475.87	0.863791	0.845643	0.905603	0.845643	369.78	341.75	383.25	383.25	537.028
SecN38	8q	C=CCNCC=C	18	Training	-0.295627	-0.299	-0.284	-0.29814	0.0352404	0.02469	0.0413	0.03175	0.330867	0.31482	0.33675	0.32989	-0.130193	-0.137155	-0.122985	-0.133195	0.0256317	0.02336	0.02906	0.02689	34.4129	11.3575	55.183	41.1362	80.9606	78.5186	82.734	82.6143	0.969089	0.621	1.3728	0.8331	1060.23	815.979	1410.7	1005.68	0.89711	0.88397	0.922036	0.88397	298.069	285.151	305.652	305.652	411.041
SecN63	8r	CNCC	63	Training	-0.288712	-0.28872	-0.28871	-0.28871	0.0669757	0.06654	0.06709	0.06709	0.355688	0.35526	0.3558	0.3558	-0.110868	-0.11109	-0.11081	-0.11081	0.0172829	0.01726	0.01737	0.01726	10.8207	8.10828	11.5321	11.5321	47.1581	46.7285	47.2708	47.2708	1.00038	0.9934	1.027	0.9934	792.011	789.963	799.818	789.963	0.935213	0.933607	0.941335	0.933607	227.125	224.36	227.85	227.85	291.089
SecN18	8s	CNCc1ccccc1	38	Test	-0.289598	-0.29073	-0.2867	-0.28968	0.0212142	0.01695	0.02241	0.02176	0.310812	0.30365	0.31314	0.31144	-0.134192	-0.134875	-0.13396	-0.13396	0.0289726	0.02874	0.02995	0.02881	49.8922	43.064	56.531	56.531	98.8143	97.9566	99.6923	99.6923	1.08078	1.0112	1.1856	1.0112	1250.41	1084.2	1501.66	1086.33	0.901079	0.89464	0.911291	0.89464	312.868	307.612	316.422	316.422	445.056
SecN6	8t	CCNCC	44	Training	-0.288307	-0.28861	-0.28381	-0.28845	0.0660666	0.06223	0.06761	0.06585	0.354373	0.34604	0.35622	0.3543	-0.11112	-0.1113	-0.1105	-0.1113	0.0174215	0.01714	0.01774	0.01748	16.0295	10.5649	16.752	16.752	59.4863	58.2808	59.6469	59.6469	0.954944	0.9458	1.0812	0.9458	858.67	688.598	943.339	874.8	0.914827	0.912523	0.932488	0.912523	259.134	250.5	260.33	260.33	343.196
SecN13	8u	CC(NC(C)C)C	0	Training	-0.284744	-0.28597	-0.28063	-0.28461	0.0601441	0.05668	0.06177	0.05992	0.344889	0.33964	0.34774	0.34453	-0.1123	-0.113935	-0.11081	-0.112345	0.0182864	0.01807	0.01902	0.01832	16.7756	15.1414	18.2907	16.5484	82.9105	82.1911	83.1993	82.8773	0.938353	0.9138	1.0863	0.9138	981.298	837.773	1179.65	1000.84	0.910584	0.910098	0.922606	0.910098	301.998	295.401	302.241	302.241	428.802
SecN174	8v	CC(C)NCC	0	Training	-0.288054	-0.28899	-0.28184	-0.28899	0.0634575	0.05804	0.06531	0.06414	0.351512	0.34151	0.35313	0.35313	-0.112298	-0.11305	-0.110455	-0.112425	0.0179423	0.01735	0.01867	0.0179	16.2942	9.9424	16.7561	16.7561	71.2426	69.8316	71.3991	71.3991	0.97968	0.9469	1.0885	0.9705	991.922	971.354	1074.24	977.534	0.913747	0.911443	0.933705	0.911443	280.413	270.17	281.571	281.571	385.644
SecN143	8w	COCCNCCOC	0	Training	-0.284736	-0.2992	-0.27484	-0.2852	0.0721518	0.05479	0.07498	0.07498	0.356888	0.33079	0.36367	0.36018	-0.106292	-0.118525	-0.102905	-0.10511	0.0158432	0.01534	0.01953	0.01534	23.7769	12.1317	40.2616	23.4758	91.7932	89.1422	92.7341	92.443	1.05149	0.4514	3.1244	0.7099	1381.11	960.804	1688.39	1238.1	0.86023	0.852328	0.917294	0.858469	351.628	318.27	360.779	355.52	497.727
SecN30	8x	C1(NC2CCCCC2)CCCCC1	0	Validation - Classification	-0.279335	-0.28218	-0.27356	-0.27953	0.0595395	0.05331	0.06097	0.05998	0.338874	0.3308	0.34273	0.33951	-0.109898	-0.11254	-0.10665	-0.109775	0.0178234	0.01704	0.01899	0.01775	42.214	25.1985	46.085	44.5378	144.012	141.826	144.808	144.483	0.900517	0.8553	1.0085	0.884	1993.32	1546.44	2203.73	2124.92	0.873353	0.869774	0.894168	0.869774	406.047	390.71	409.14	409.14	628.292
SecN272	8y	CCC(C)NC(C)CC	0	Validation - Classification	-0.282058	-0.28461	-0.27616	-0.28319	0.0598554	0.05506	0.06395	0.0601	0.341914	0.33469	0.34627	0.34329	-0.111101	-0.11406	-0.10641	-0.111545	0.0180541	0.01662	0.01911	0.01812	20.3056	14.0742	31.9153	14.7774	106.005	105.087	106.794	106.207	0.933795	0.7979	1.1472	0.9034	1473.15	1152.12	1634.42	1539.83	0.891917	0.884327	0.909603	0.88914	349.986	338.141	354.631	352.931	519.312
SecN19	8z	c1(CNCc2ccccc2)ccccc1	0	Validation - Classification	-0.289708	-0.29212	-0.27768	-0.29137	0.0152212	0.01407	0.01669	0.01669	0.304929	0.29175	0.30806	0.30806	-0.137243	-0.138295	-0.131805	-0.13734	0.0308847	0.02977	0.03112	0.03061	80.8168	56.2592	96.4608	76.3633	164.008	155.504	166.16	164.802	0.977142	0.824	1.1291	0.9742	1805.77	1384.71	2264.22	1721.89	0.854111	0.841439	0.905374	0.849572	422.96	385.212	433.193	426.323	645.329
SecN279	8aa	CC(C)NC1CCCCC1	0	Validation - Classification	-0.281877	-0.28442	-0.27502	-0.2808	0.0606578	0.05627	0.06444	0.0618	0.342535	0.33464	0.3465	0.3426	-0.11061	-0.11279	-0.10529	-0.1095	0.0178628	0.01633	0.01869	0.0175	29.3693	21.3811	32.3544	30.1497	113.367	111.909	113.86	113.519	0.919327	0.815	1.099	0.9767	1639.63	1310.88	1827.01	1543.96	0.892363	0.890428	0.907383	0.891016	354.322	344.87	356.02	355.41	528.889
SecNSar15	8ab	CNC(C1=CC=CC=C1)c2ccccc2	0	Validation - Regression	-0.288319	-0.28903	-0.28814	-0.28814	0.00980847	0.0096	0.01155	0.0096	0.298127	0.29774	0.29988	0.29774	-0.139255	-0.13927	-0.13839	-0.13927	0.0325219	0.03193	0.03257	0.03257	47.1674	41.2022	75.3597	41.2022	163.809	163.667	164.09	163.739	0.93521	0.8783	1.1681	0.8783	1836.02	1491.01	2019.99	1856.41	0.863347	0.862783	0.870844	0.862783	414.705	407.483	415.153	415.153	637.03
SecN20	8ac	CCCNCCC	22	Validation - Regression	-0.286304	-0.28796	-0.27402	-0.28796	0.0635043	0.05785	0.0678	0.06463	0.349809	0.33689	0.35568	0.35259	-0.1114	-0.11292	-0.105575	-0.111665	0.0177438	0.01654	0.01855	0.01768	23.7122	14.6431	30.376	30.376	83.1223	81.2354	83.9636	83.9636	0.90352	0.8049	1.1035	0.8625	1176.11	912.564	1350.75	1196.49	0.889014	0.878125	0.921935	0.878125	314.843	294.98	321.49	321.49	440.227
SecN99	8ad	O=C(OC)C1CCNCC1	80	Validation - Regression	-0.292959	-0.29471	-0.28311	-0.29471	0.0469042	0.0391	0.04908	0.04908	0.339863	0.32221	0.34379	0.34379	-0.123027	-0.12397	-0.122005	-0.122815	0.0222793	0.02194	0.02313	0.02194	25.823	18.1869	28.7861	28.7861	93.4714	92.1062	93.9249	93.9249	2.28937	1.6257	2.49	2.49	1512.06	1120.41	1569.56	1569.56	0.90133	0.897663	0.912391	0.897663	326.238	319.419	328.579	328.579	474.086
SecN234	8ae	CN(C)[C@@H]1CCNC1	57	Validation - Regression	-0.278047	-0.28093	-0.26179	-0.27868	0.0629116	0.05442	0.06434	0.06434	0.340959	0.31766	0.34327	0.34302	-0.107568	-0.109295	-0.10296	-0.10717	0.0169716	0.01669	0.01793	0.01674	20.5235	14.9172	21.6259	21.6259	86.1128	84.5682	86.3136	86.3136	0.811109	0.4809	1.6875	0.4809	1174.21	1106.84	1377.32	1148.6	0.92289	0.921597	0.932071	0.921597	296.21	290.64	296.91	296.91	425.001
SecN1248	8af	FC([C@@H]1NCCC1)(F)F	0	Validation - Regression	-0.309489	-0.31934	-0.3066	-0.3066	0.0574736	0.04381	0.06123	0.06087	0.366963	0.36033	0.37264	0.36747	-0.126008	-0.136355	-0.122865	-0.122865	0.0216892	0.02054	0.0258	0.02054	11.1245	10.574	11.8174	10.6688	64.6176	64.4069	65.0424	64.4069	2.18116	1.6795	3.6914	1.6795	967.539	894.973	1087.39	894.973	0.934039	0.927125	0.937546	0.937546	276.818	274.918	281.248	274.918	390.93
[truncated: 131 more columns]

## Sheet: LICSS Programs
LICSS Programs - Kevin Lawson, September 2016
Enable individual worksheets by selecting the column(s) containing Smiles strings and choosing <Ctrl Shift M>
